# Supplementary material for: Human SLFN5 and its Xenopus Laevis ortholog regulate entry into mitosis and oocyte meiotic resumption
Source: PubMed Central journal article supplement (PMC9729291; doi:10.1038/s41420-022-01274-0), 2022-12-08
Supplement: 41420_2022_1274_MOESM7_ESM.pdf [file 41420_2022_1274_MOESM7_ESM.pdf]

Figure 1H

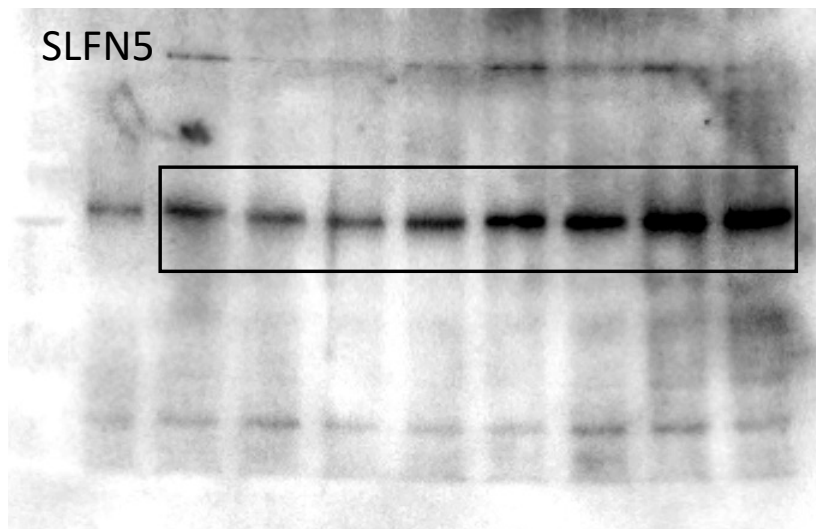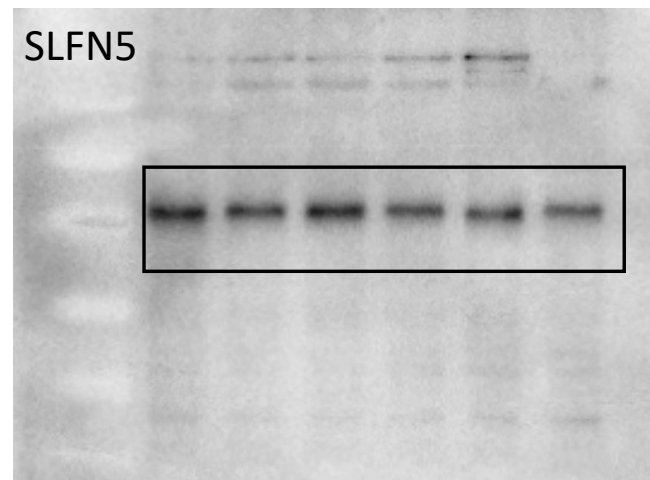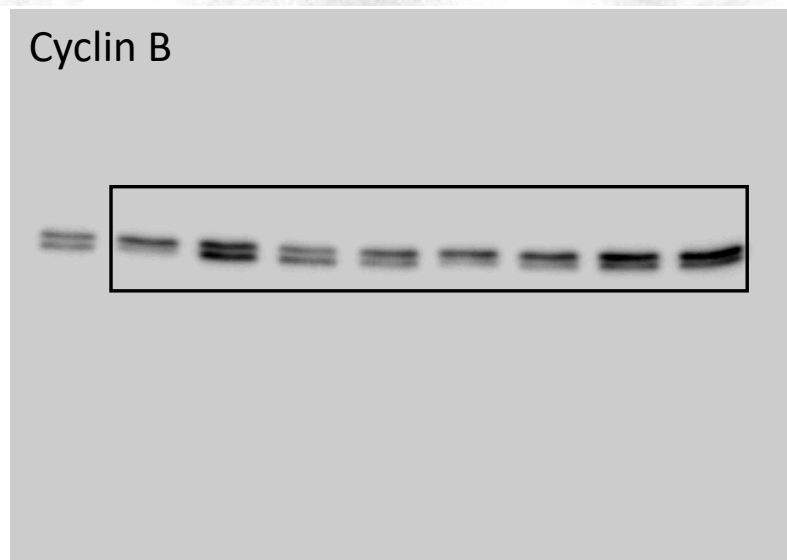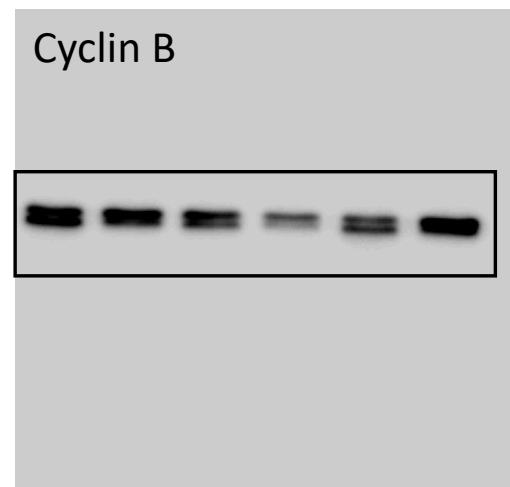

Figure 1H

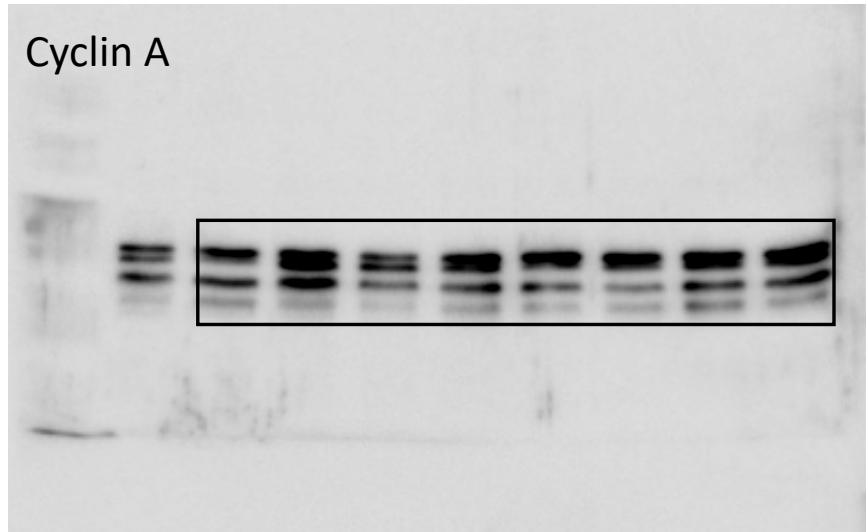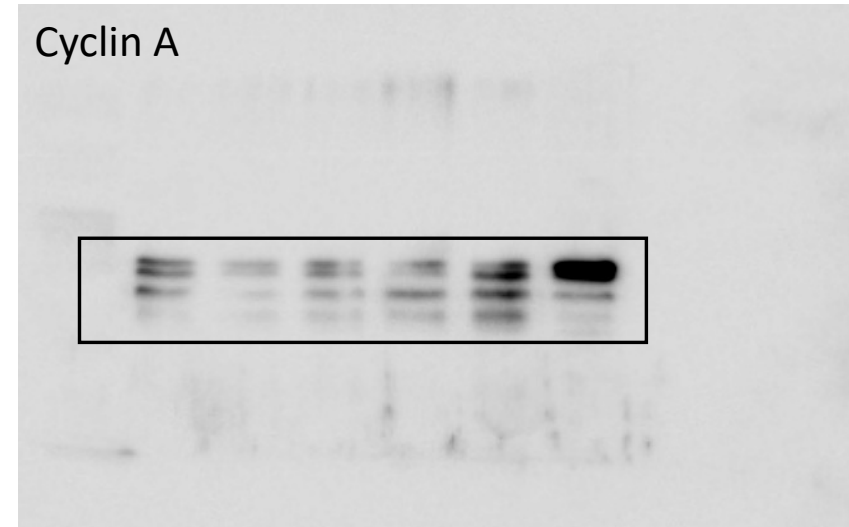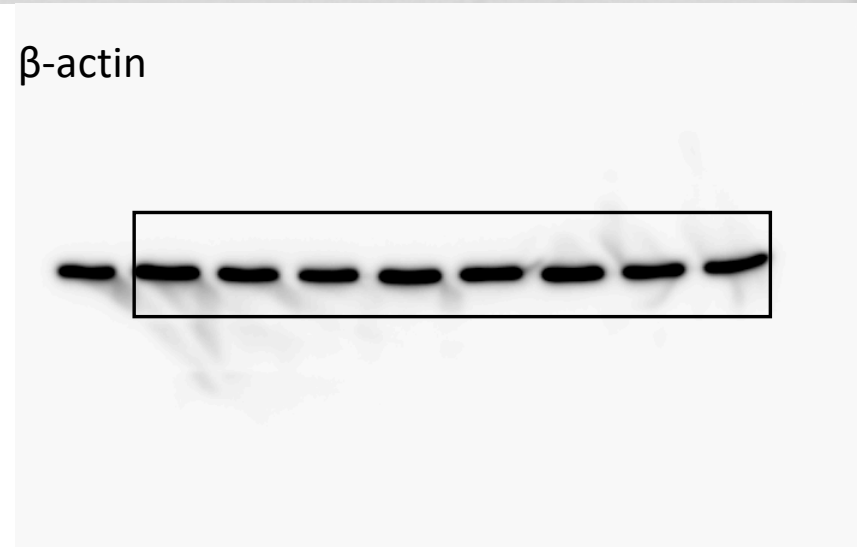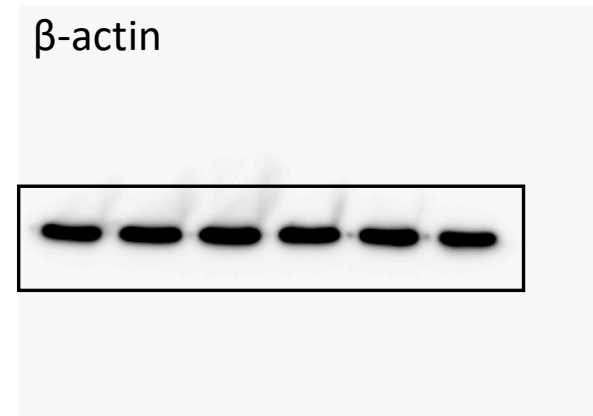

**Figure 2B**

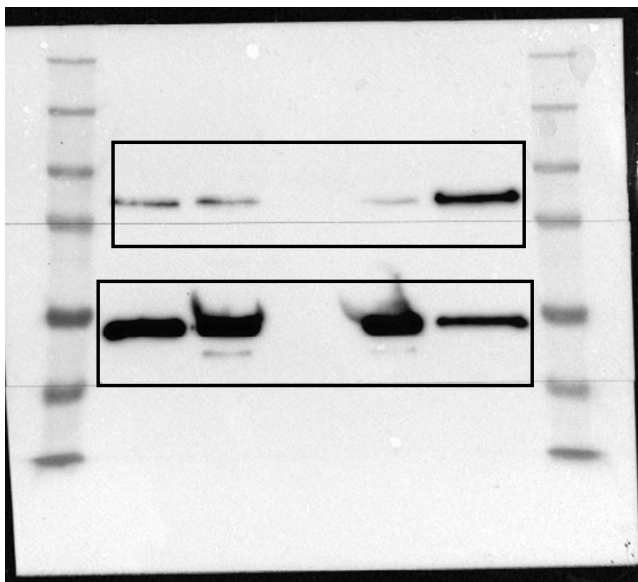

**Figure 2C**

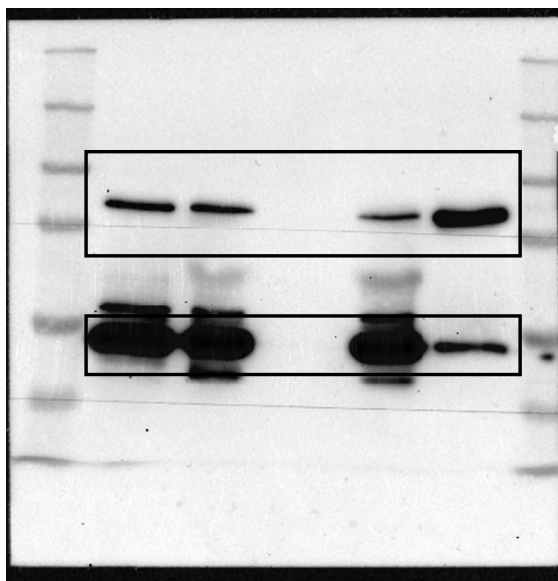

**Figure 2E**

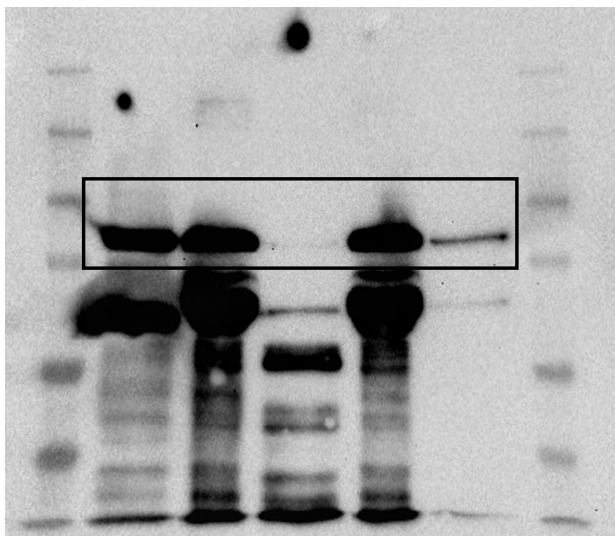

**Figure 3E**

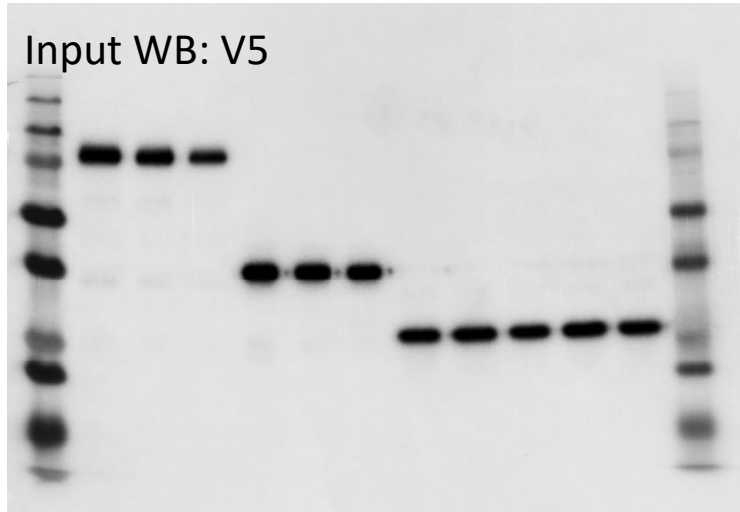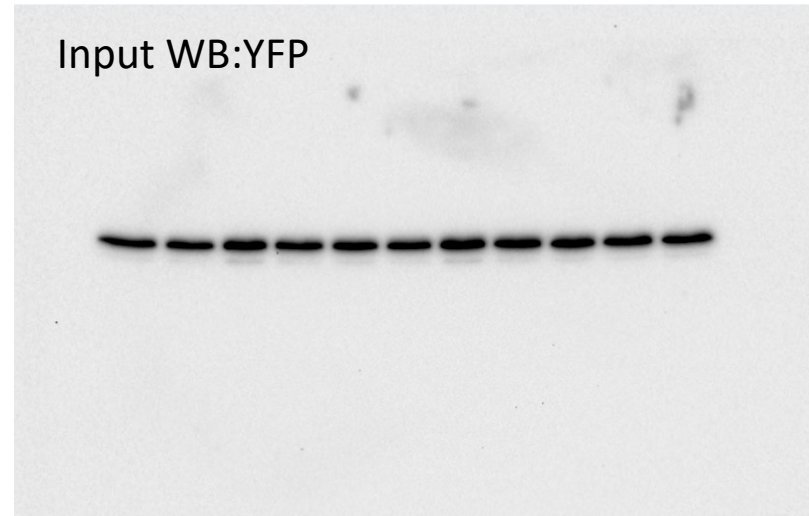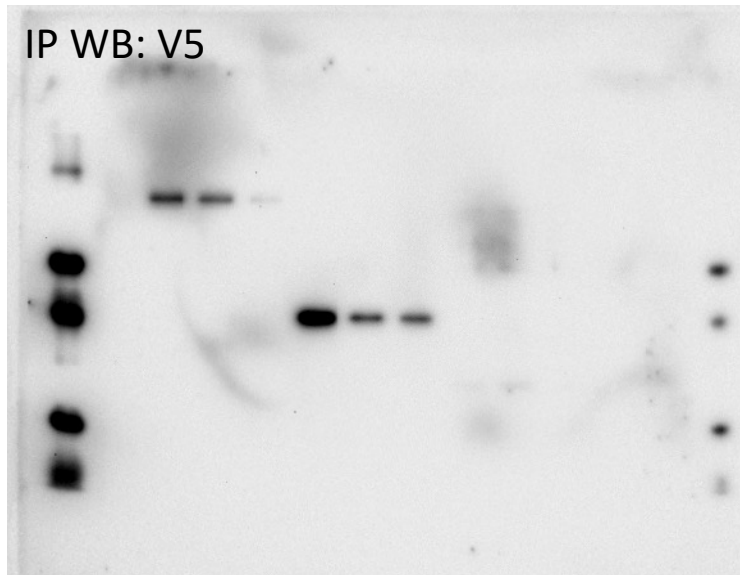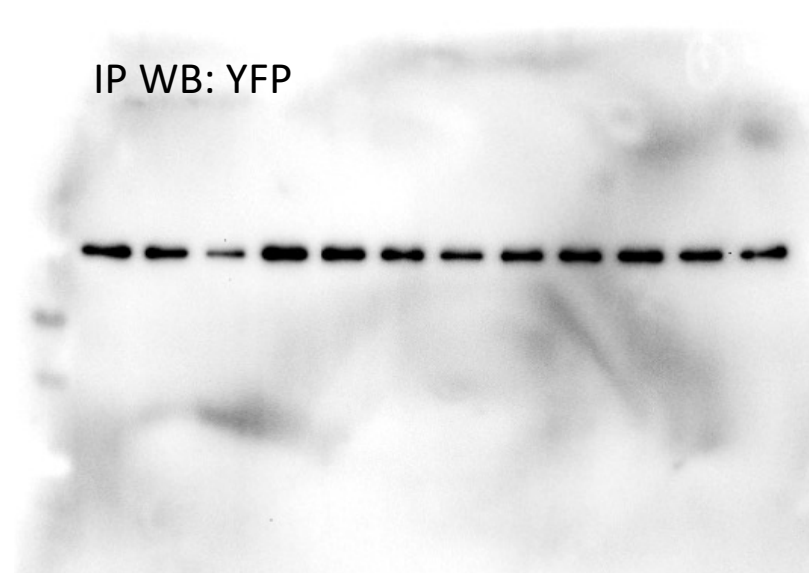

Figure 3F

Input

IP

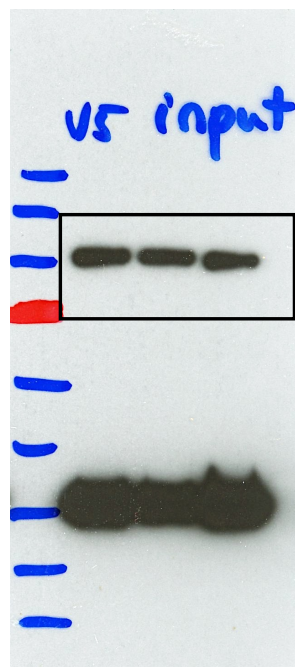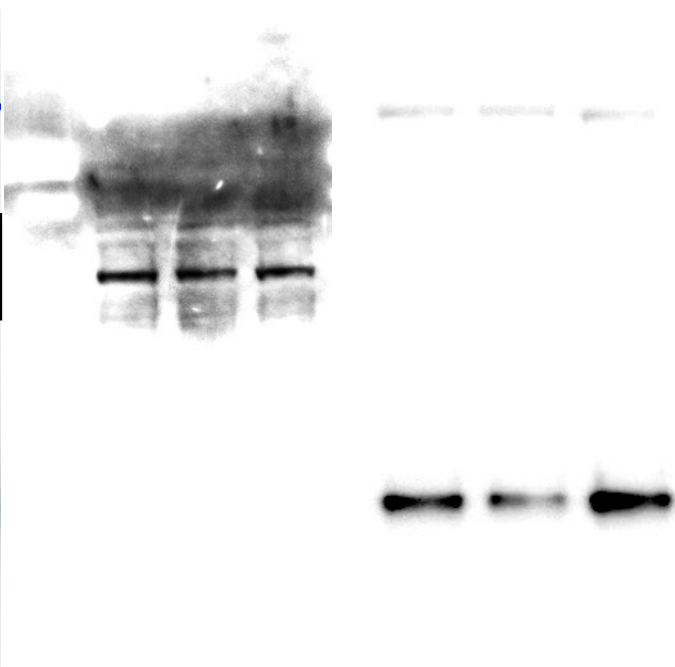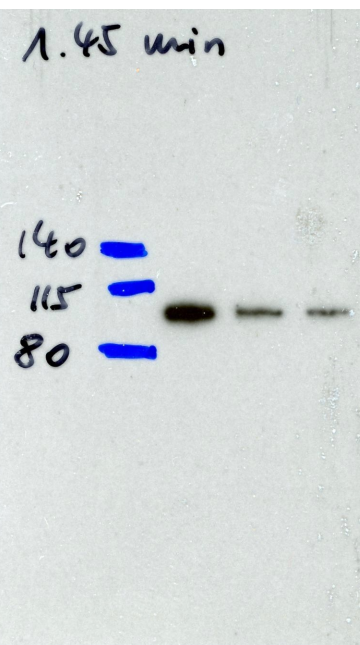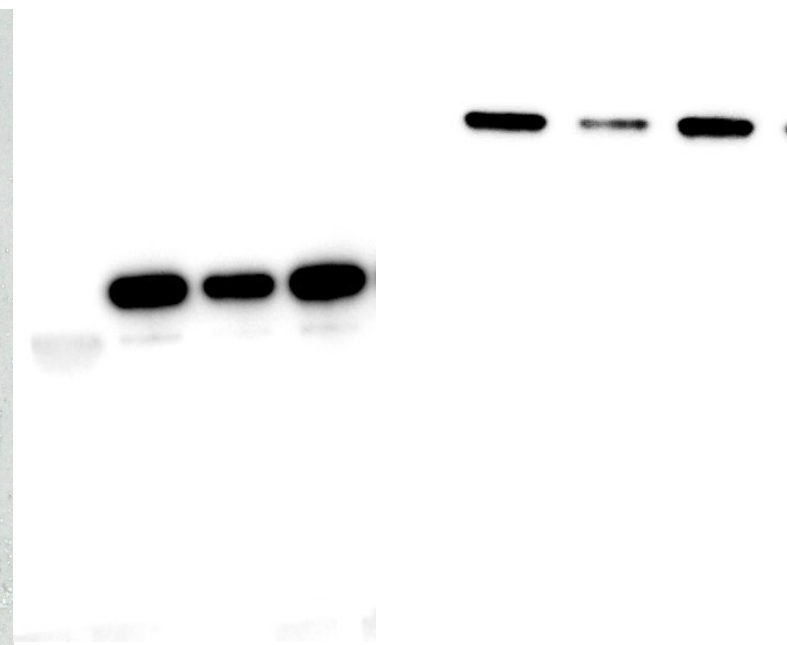

Figure 4A

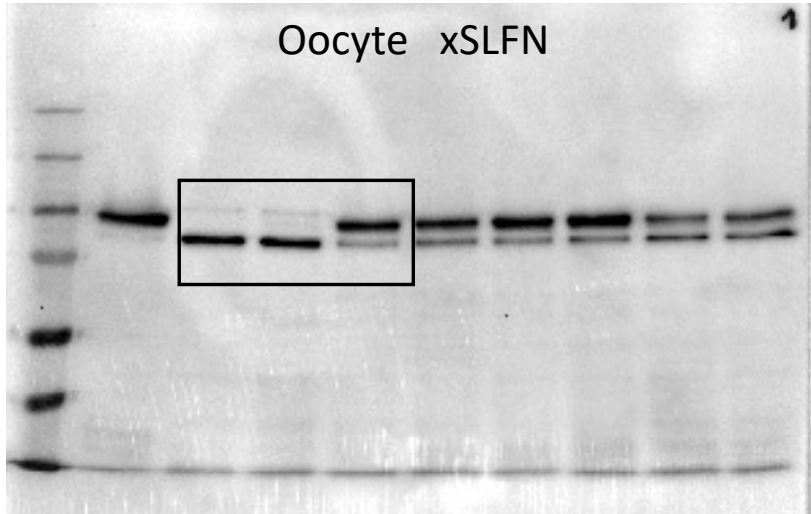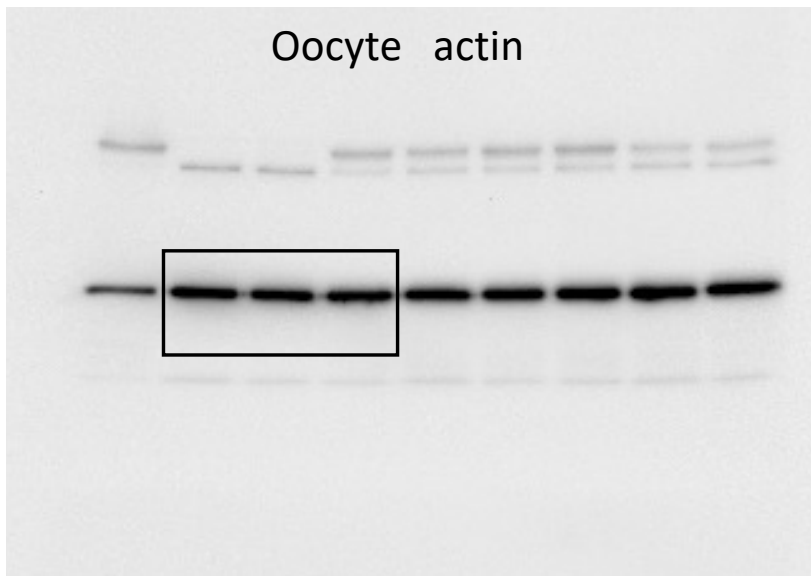

Figure 4A

Meiosis II to 2<sup>nd</sup> cleavage: xSLFN (PVDF membrane)

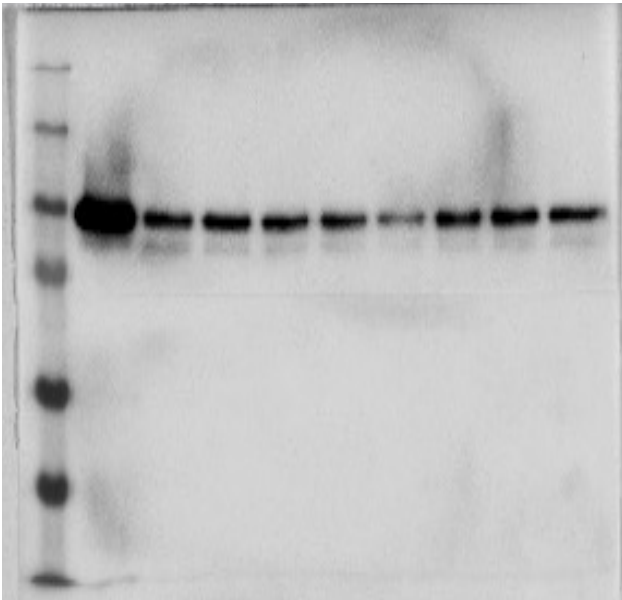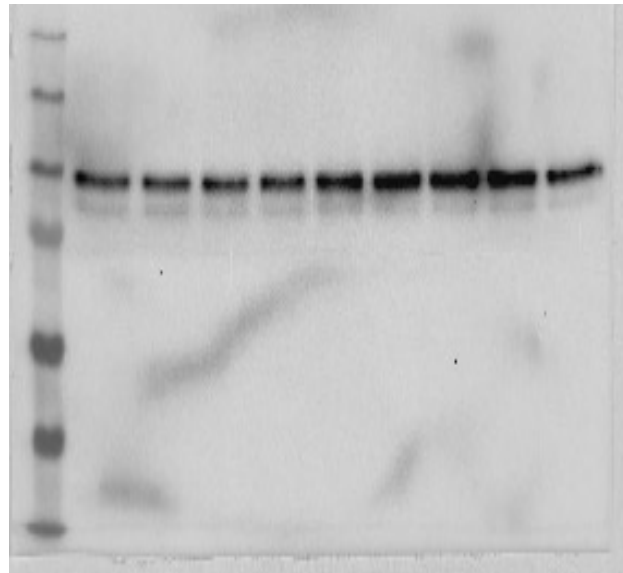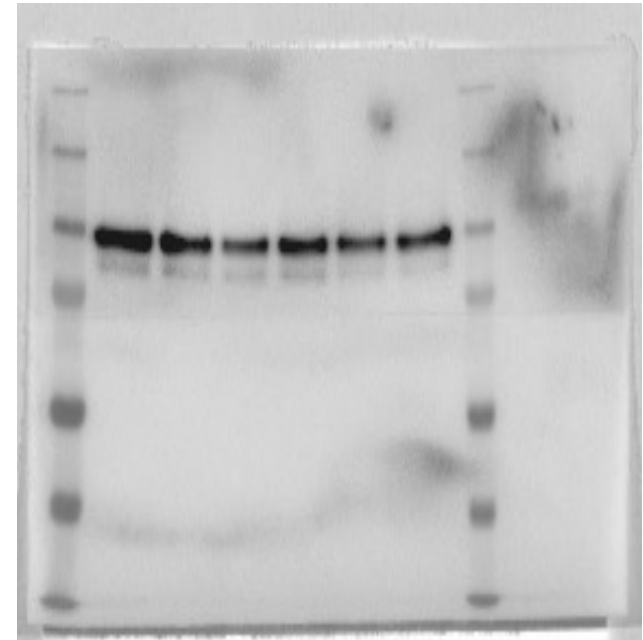

Figure 4A

Meiosis II to 2<sup>nd</sup> cleavage: xCyclin B2 (Nitrocellulose membrane)

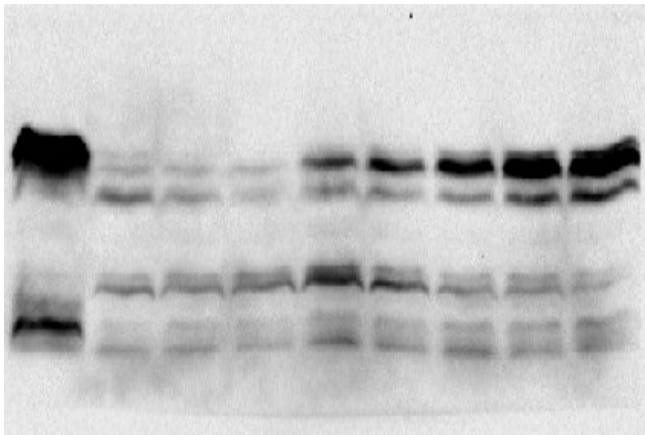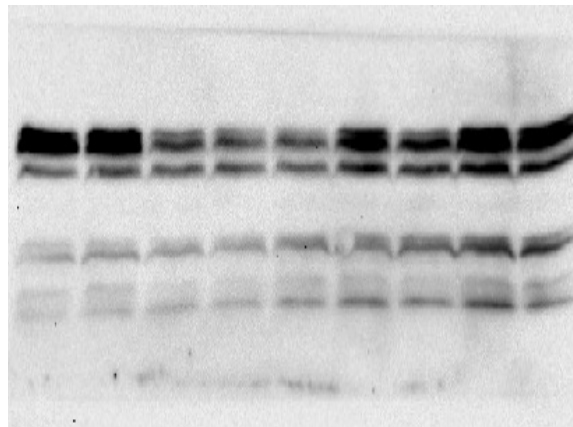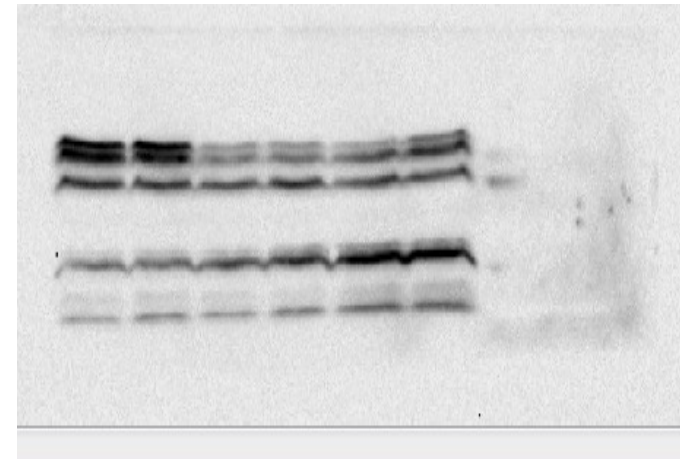



Figure 4A

Meiosis II to 2<sup>nd</sup> cleavage: actin (PVDF membrane)

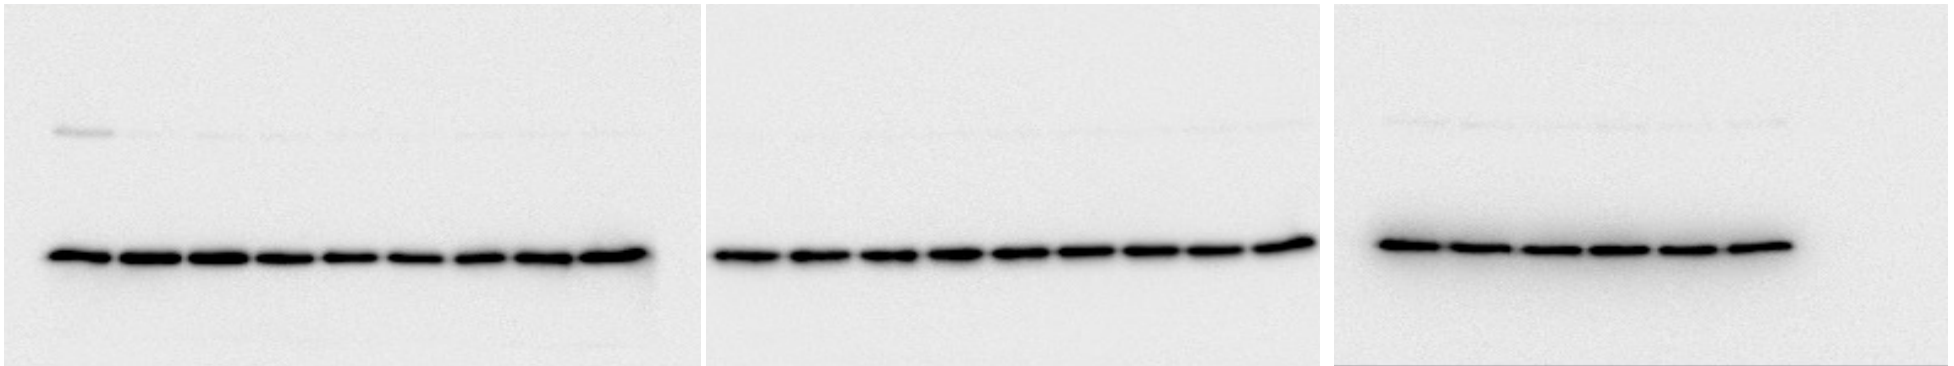

# Supplementary Figure 1

A

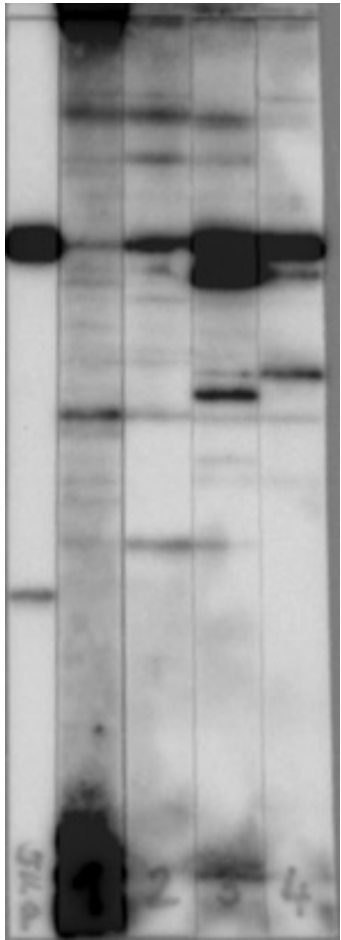

B

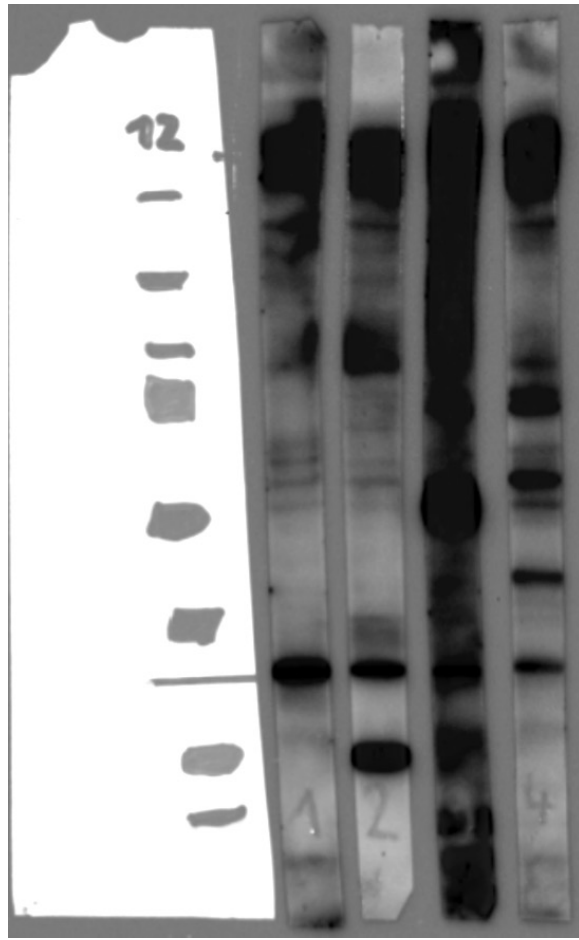

Supplementary Figure S1

C

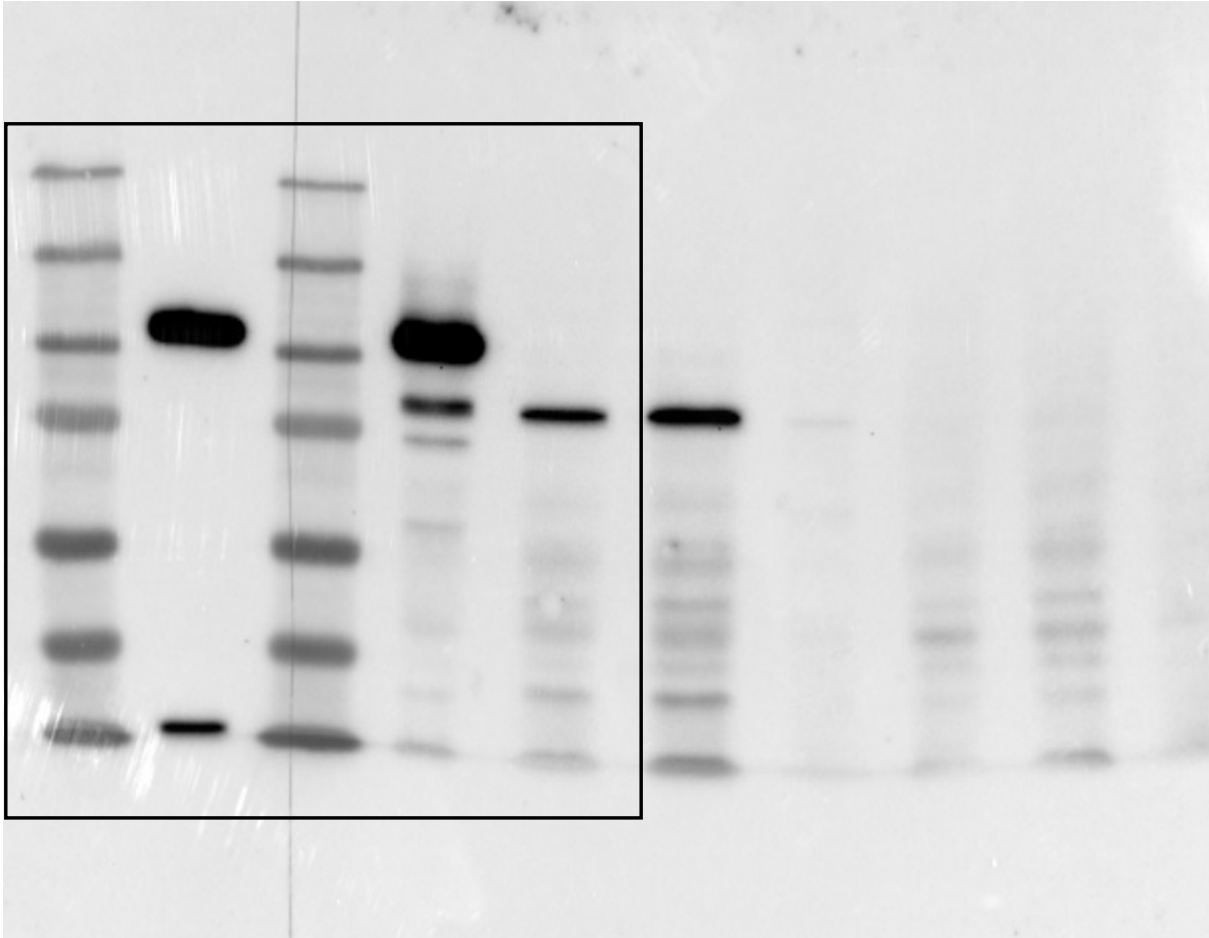

D

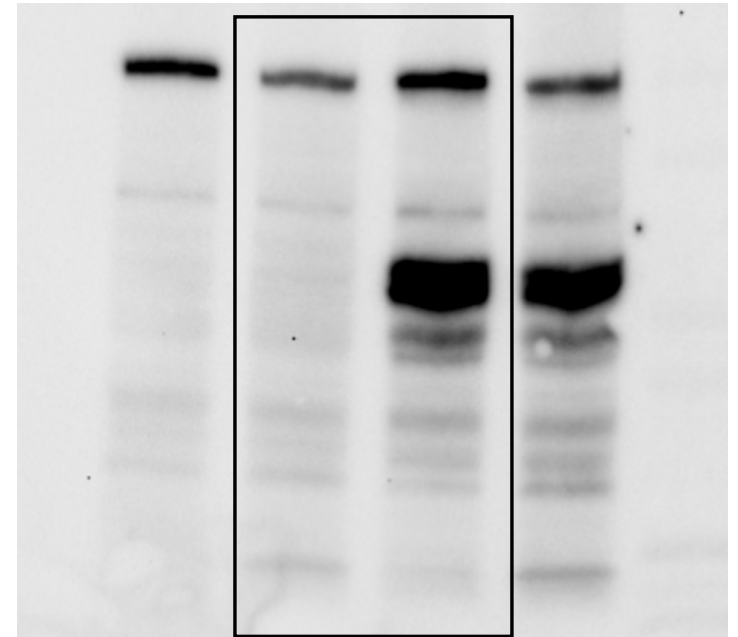

Supplementary Figure S3A

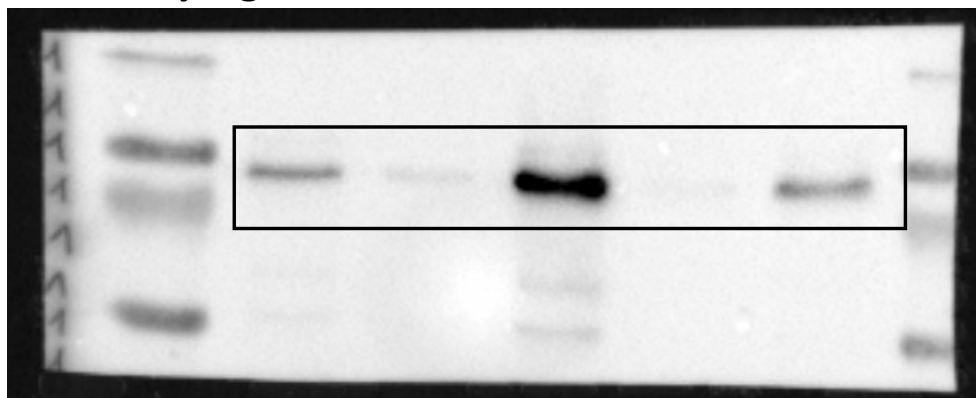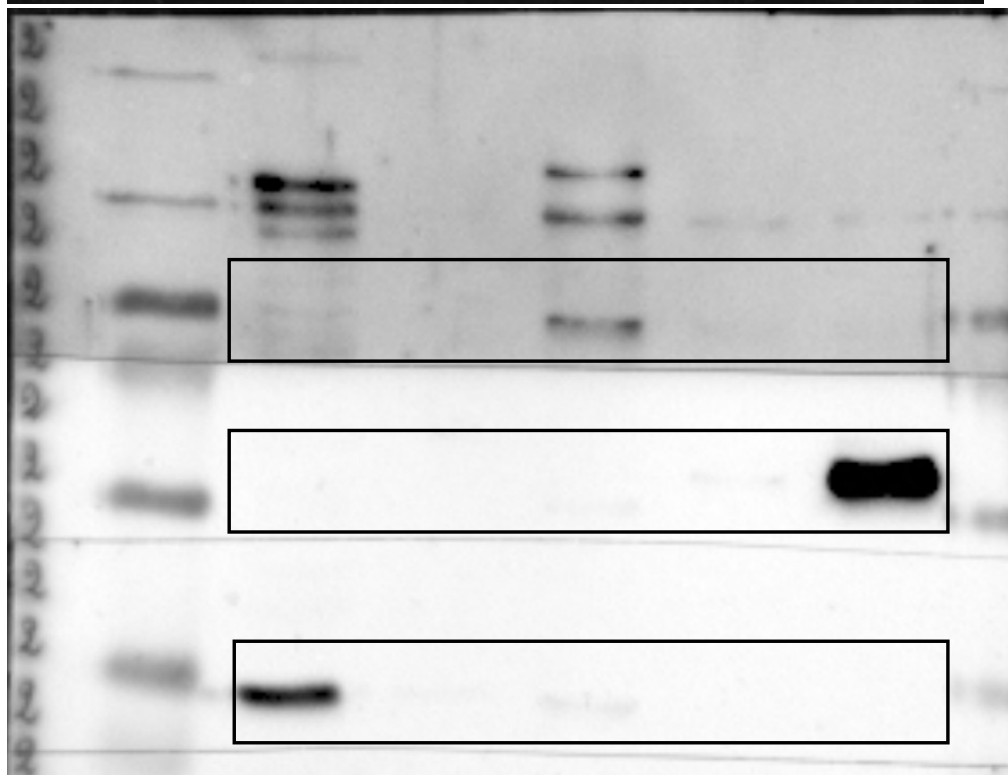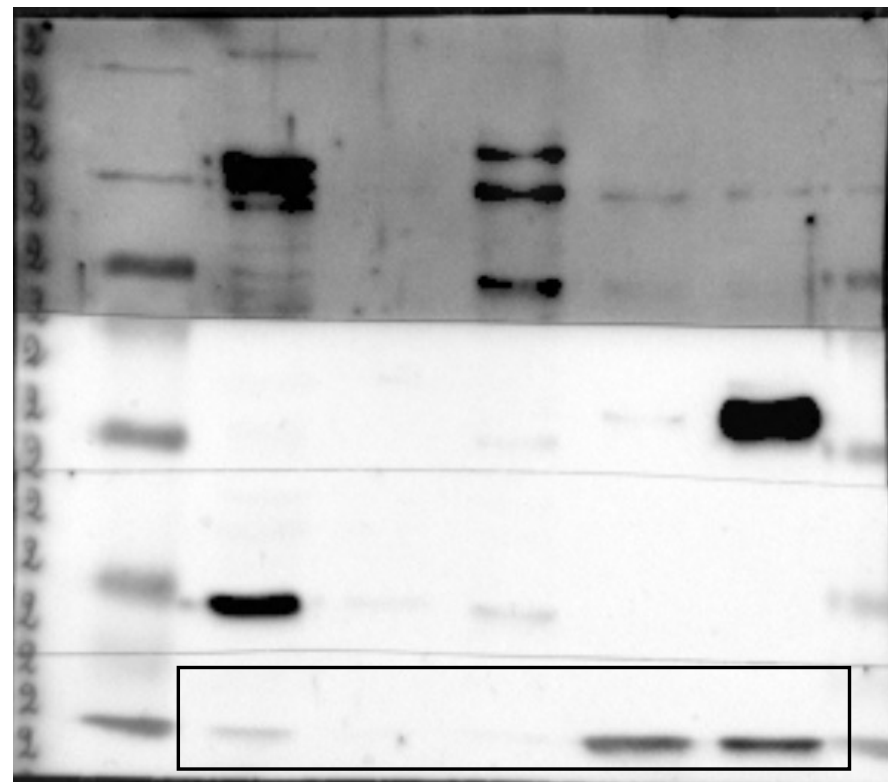

Supplementary Figure S3B

SLFN5

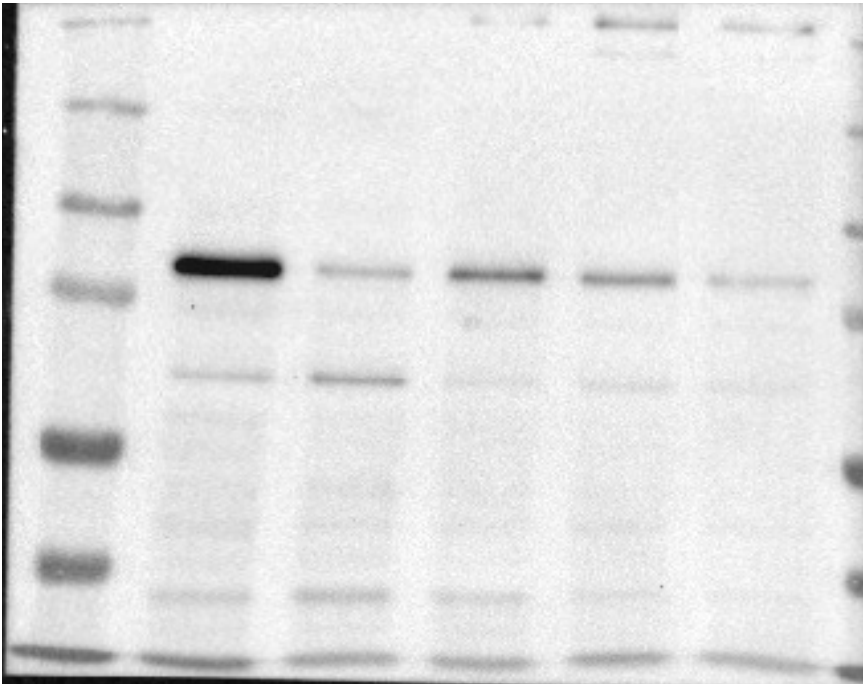

actin

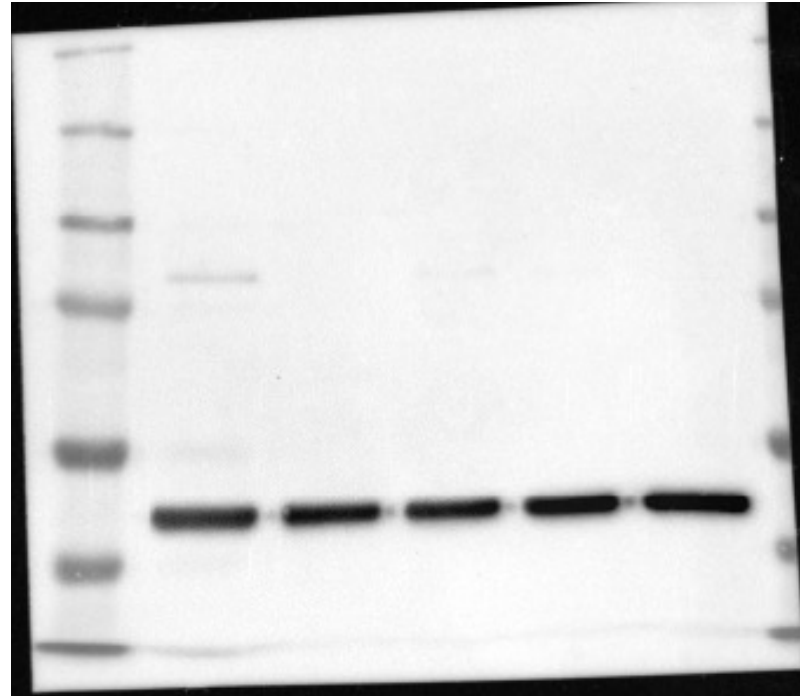

Supplementary Figure S3D

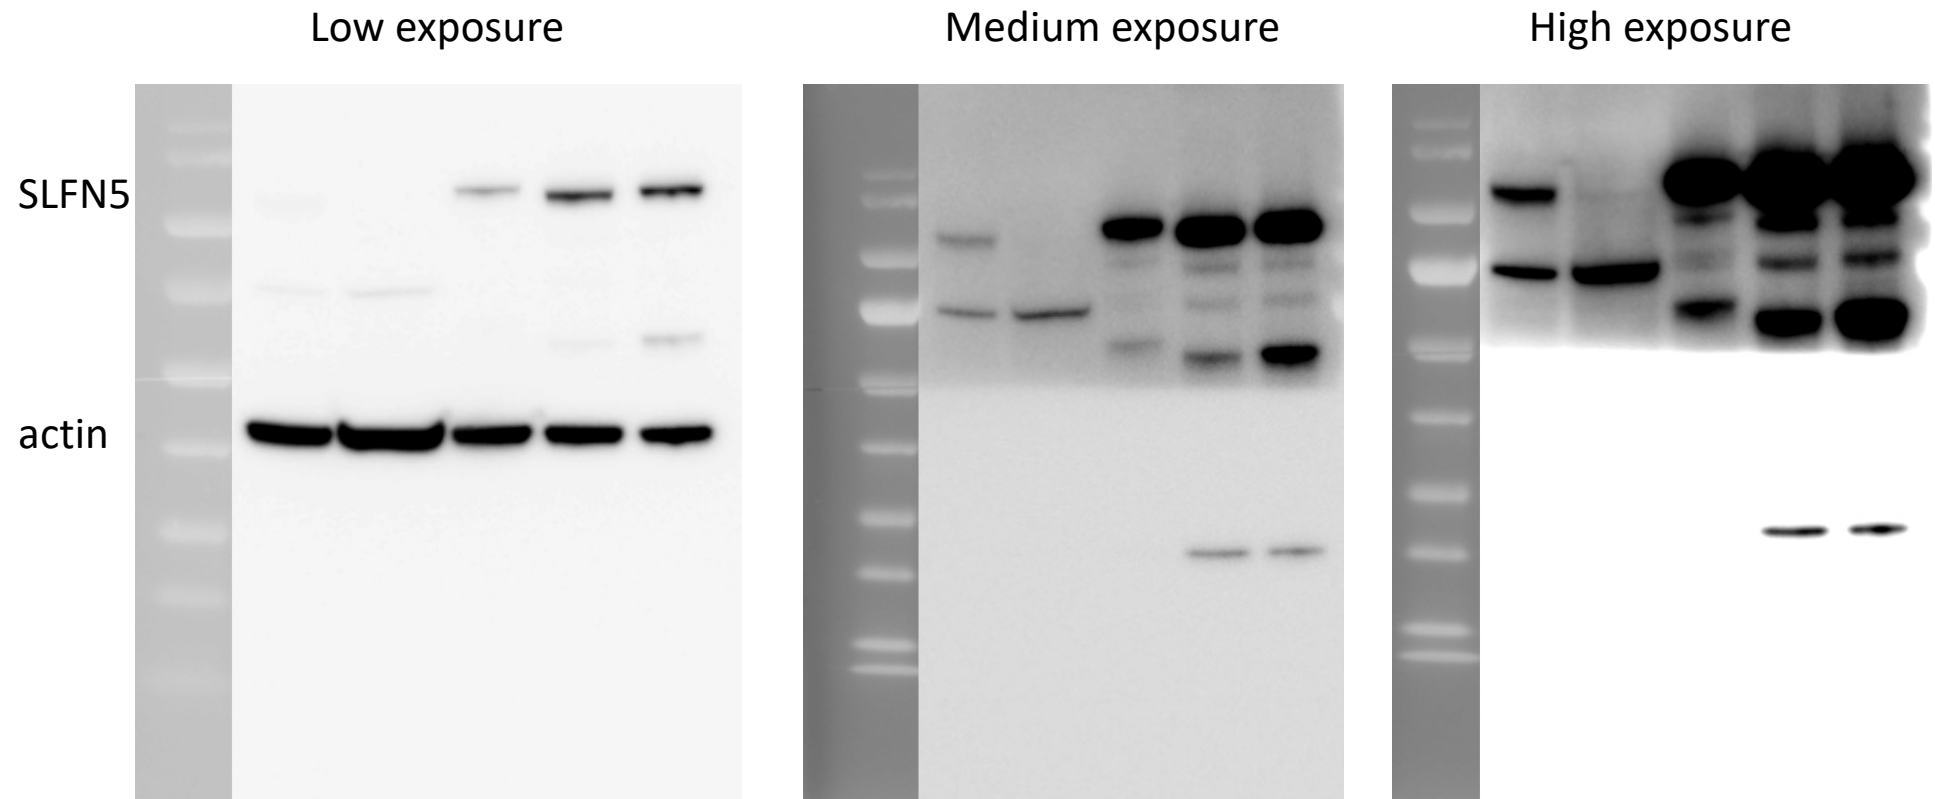

# Supplementary Figure S4

**A**

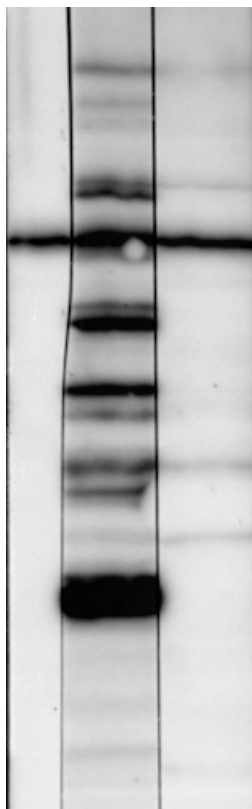

**B**

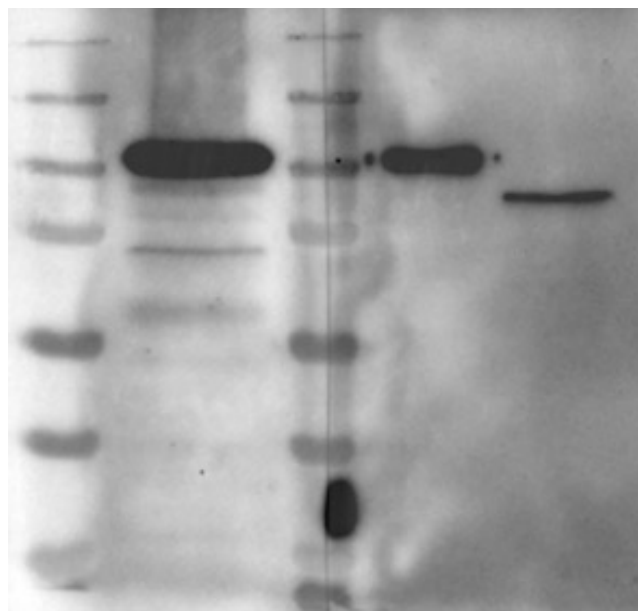

**C**

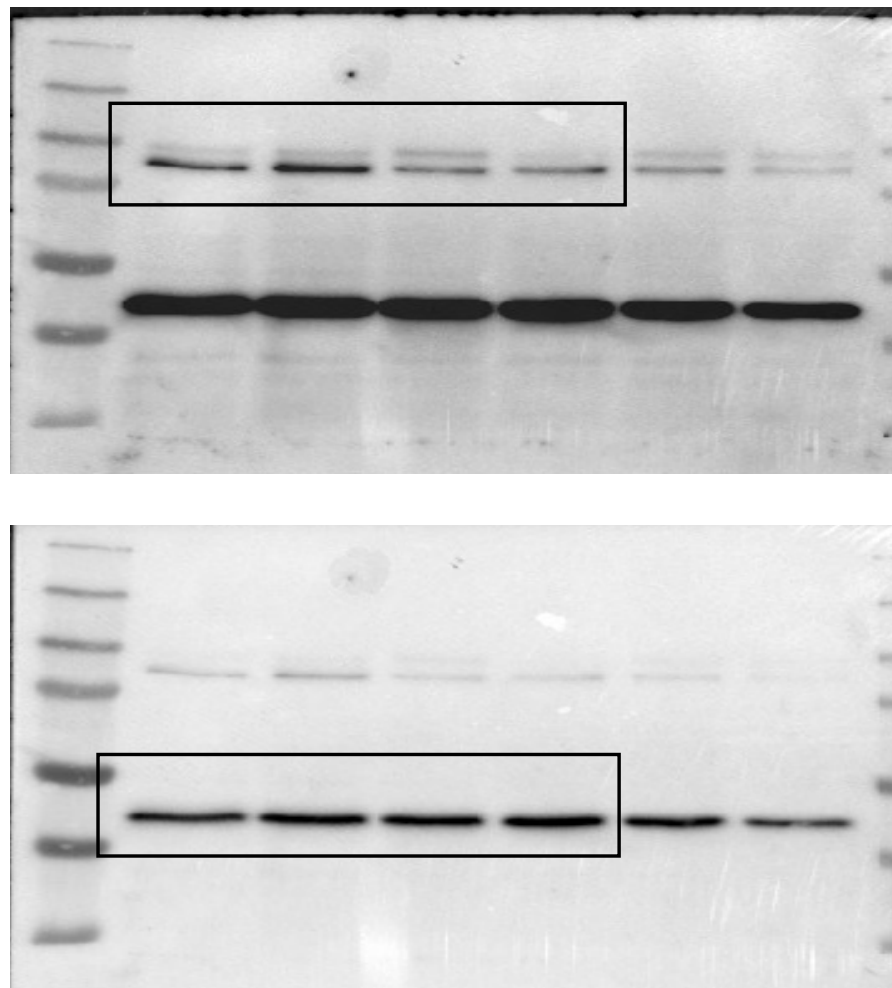

Supplementary Figure S4

D

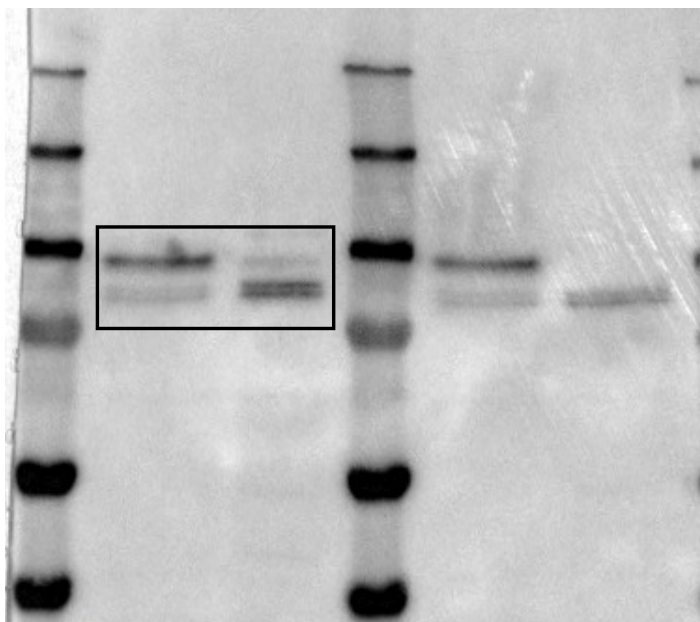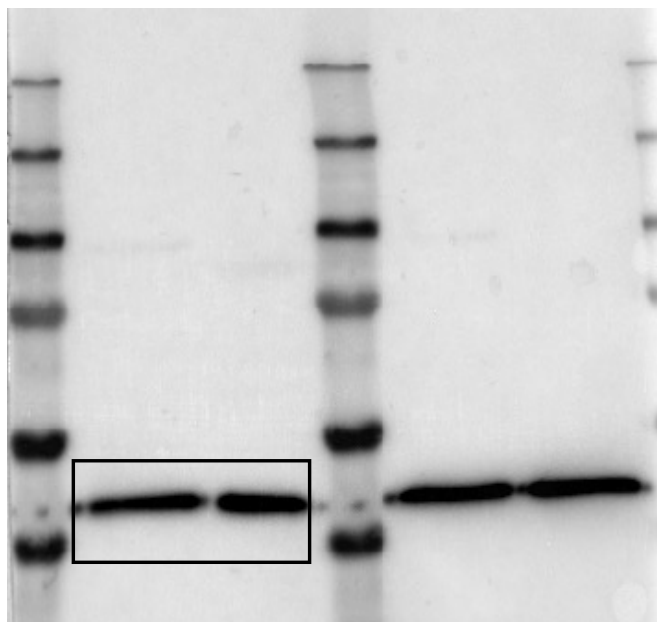

F

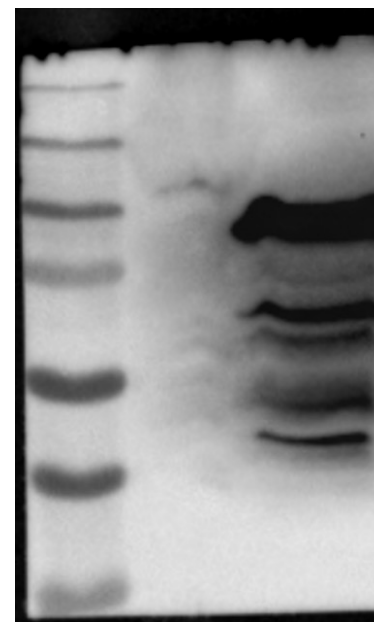



# Supplementary Figure S2A

healthy

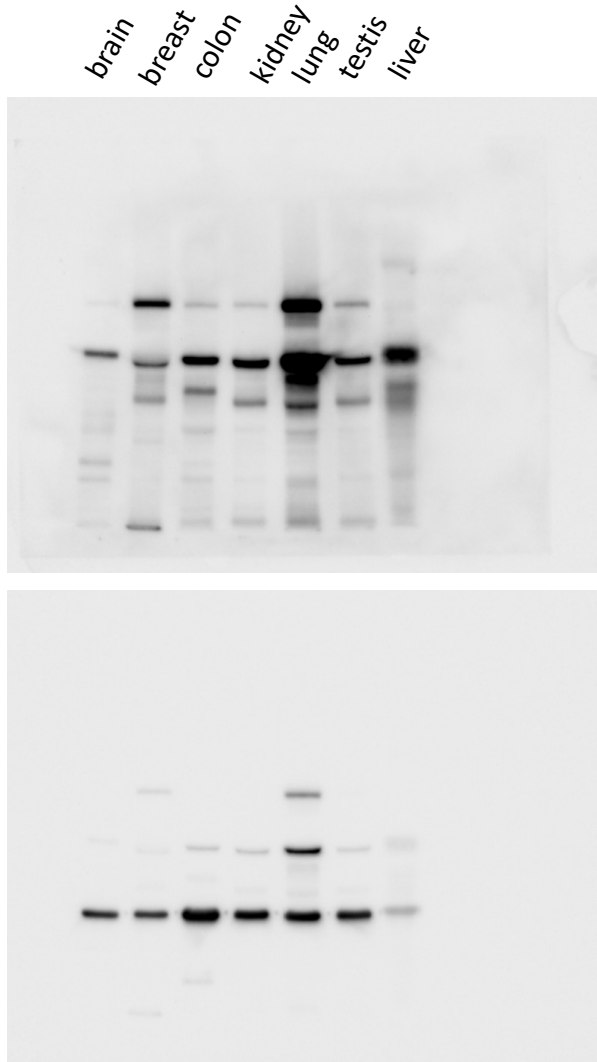

SLFN5

$\beta$ -actin

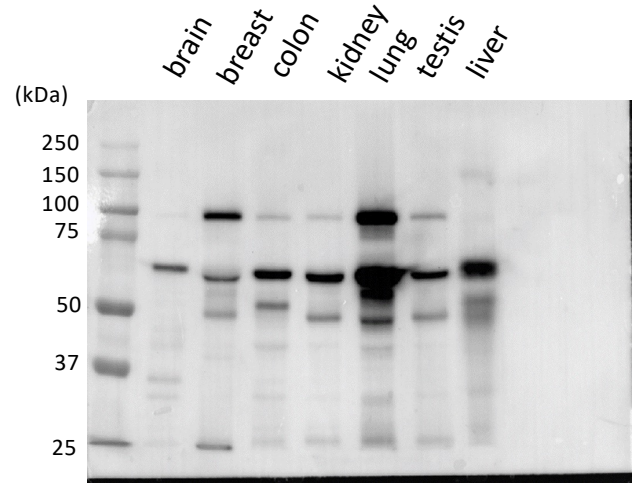

# Supplementary Figure S2A

healthy and  
cancer cell lines

BJ (fibroblast)  
HEK293T (epithelial)  
HaCat (keratinocyte)  
PBMC (blood)  
THP-1 (AML)  
CCRF-CEM (T-ALL)  
Jurkat E6.1 (T-ALL)  
U2OS (osteosarcoma)  
HeLa (cervix)

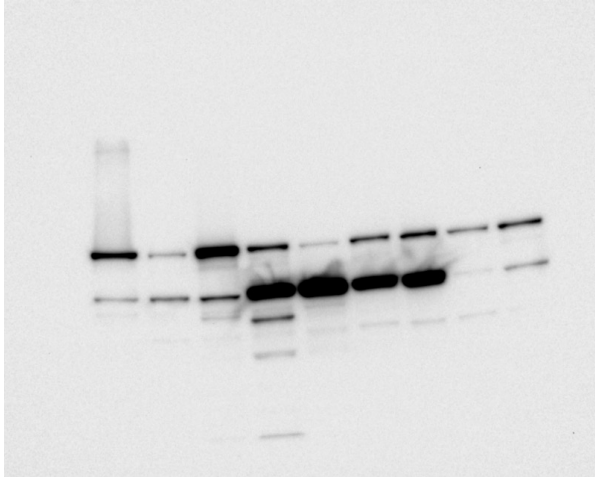

SLFN5

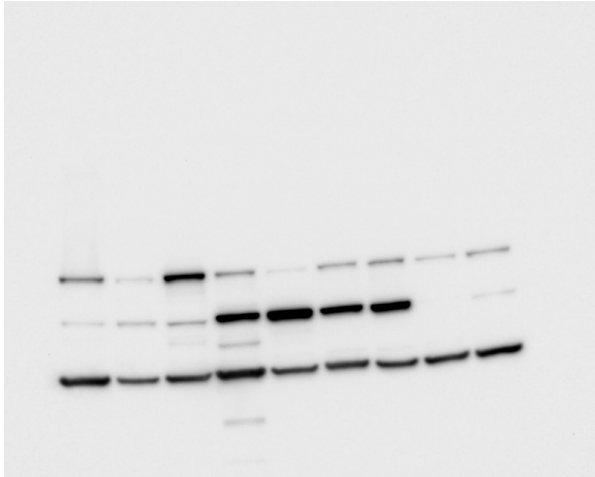

$\beta$ -actin

BJ (fibroblast)  
HEK293T (epithelial)  
HaCat (keratinocyte)  
PBMC (blood)  
THP-1 (AML)  
CCRF-CEM (T-ALL)  
Jurkat E6.1 (T-ALL)  
U2OS (osteosarcoma)  
HeLa (cervix)

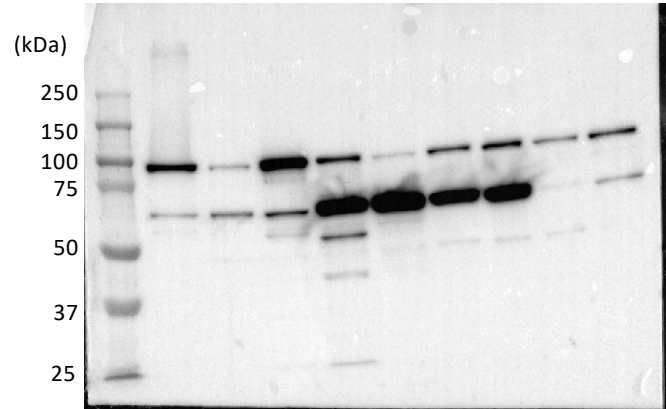

# Supplementary Figure S2A

cancer cell lines

NCH82 (brain)  
MCF-7 (breast)  
LoVo (colon)  
HCT-116 (colon)  
HepG2 (liver)  
A549 (lung)  
DU145 (prostate)  
SK-MEL (melanoma)

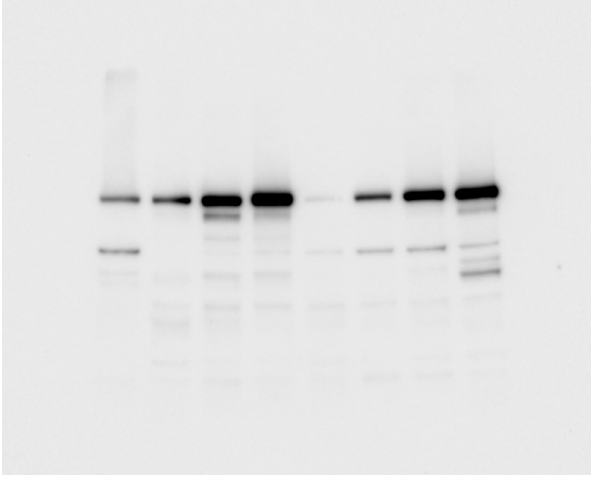

SLFN5

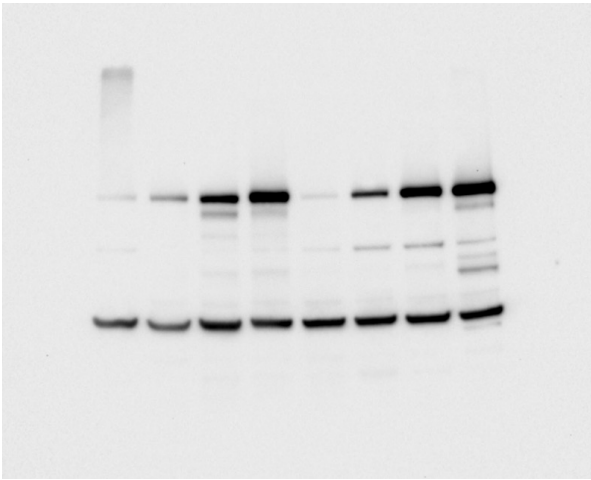

$\beta$ -actin

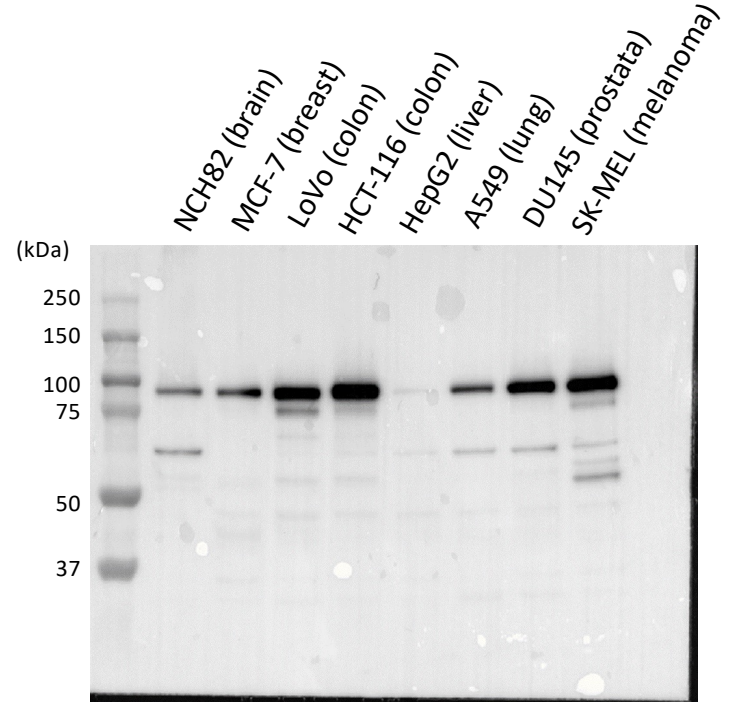

# Supplementary Figure S2B

healthy

brain  
breast  
colon  
kidney  
lung  
testis

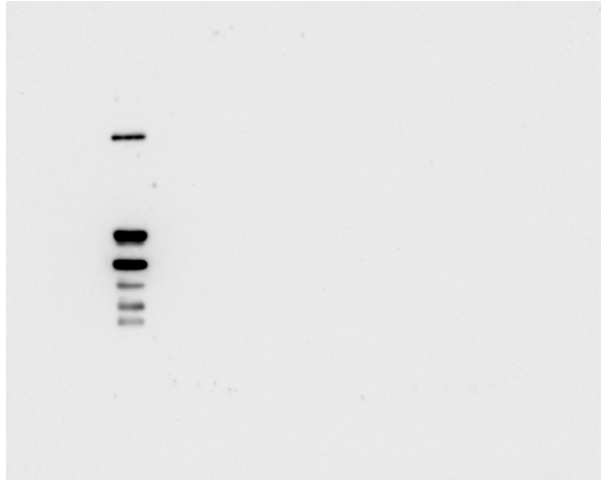

SLFN12

brain  
breast  
colon  
kidney  
lung  
testis

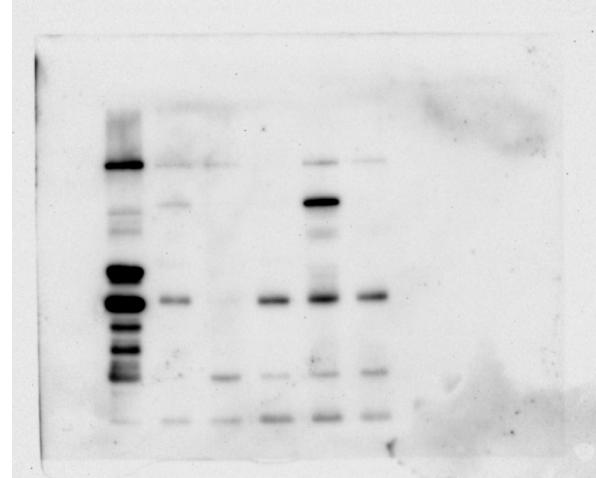

SLFN11  
(SLFN12)

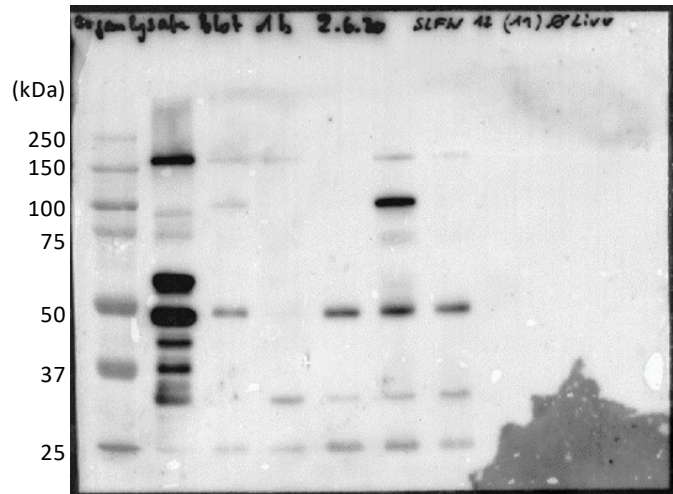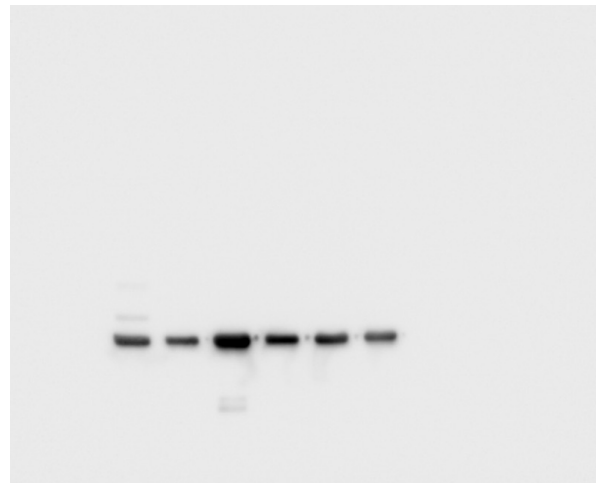

$\beta$ -actin

# Supplementary Figure S2B

BJ (fibroblast)  
HEK293T (epithelial)  
HaCat (keratinocyte)  
PBMC (blood)  
THP-1 (AML)  
CCRF-CEM (T-ALL)  
Jurkat E6.1 (T-ALL)  
U2OS (osteosarcoma)  
HeLa (cervix)

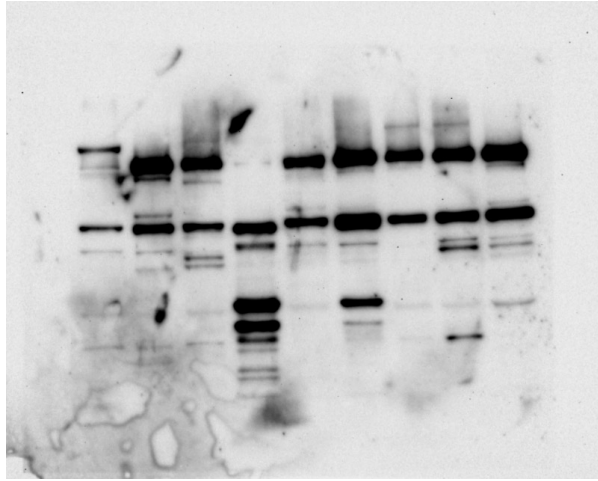

SLFN12

BJ (fibroblast)  
HEK293T (epithelial)  
HaCat (keratinocyte)  
PBMC (blood)  
THP-1 (AML)  
CCRF-CEM (T-ALL)  
Jurkat E6.1 (T-ALL)  
U2OS (osteosarcoma)  
HeLa (cervix)

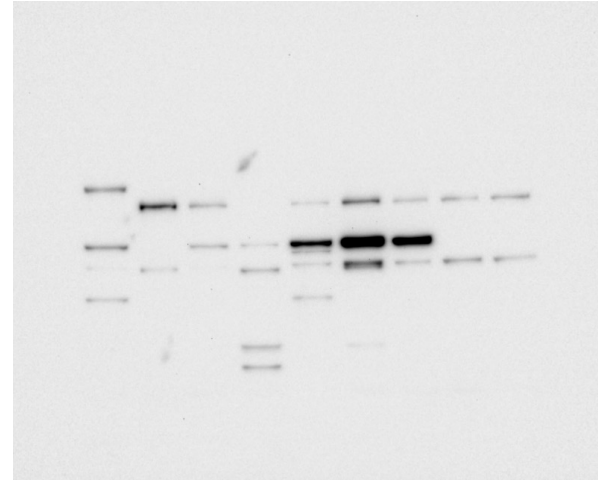

SLFN11  
(SLFN12)

healthy and  
cancer cell lines

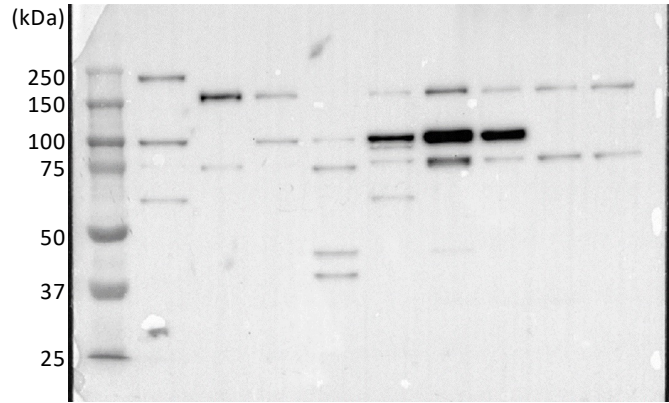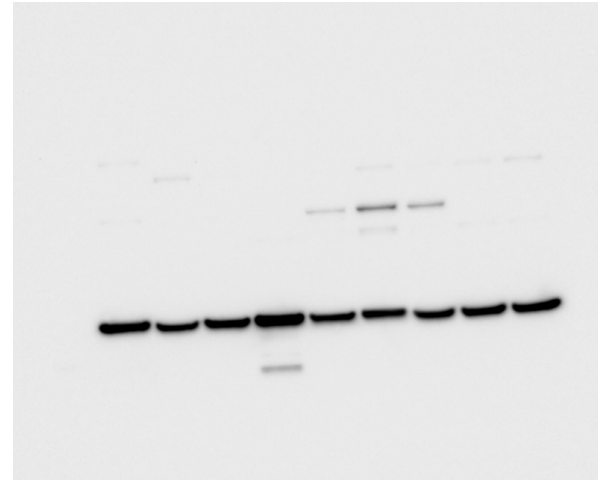

$\beta$ -actin

# Supplementary Figure S2B

NCH82 (brain)  
MCF-7 (breast)  
LoVo (colon)  
HCT-116 (colon)  
HepG2 (liver)  
A549 (lung)  
DU145 (prostate)  
SK-MEL (melanoma)

NCH82 (brain)  
MCF-7 (breast)  
LoVo (colon)  
HCT-116 (colon)  
HepG2 (liver)  
A549 (lung)  
DU145 (prostate)  
SK-MEL (melanoma)

cancer cell lines

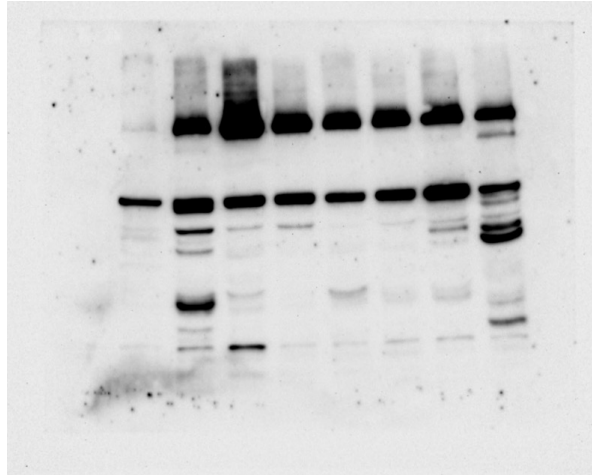

SLFN12

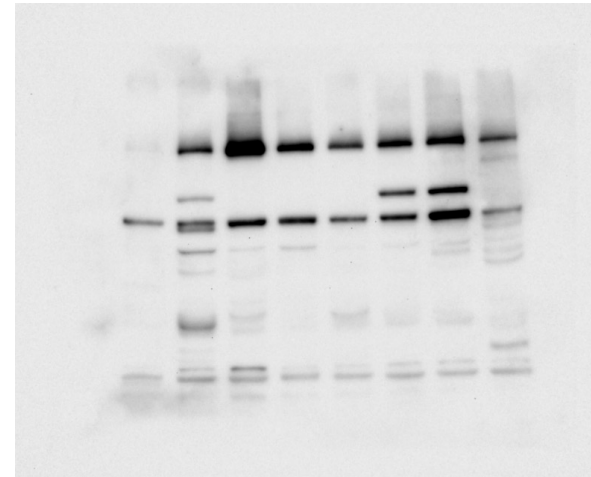

SLFN11  
(SLFN12)

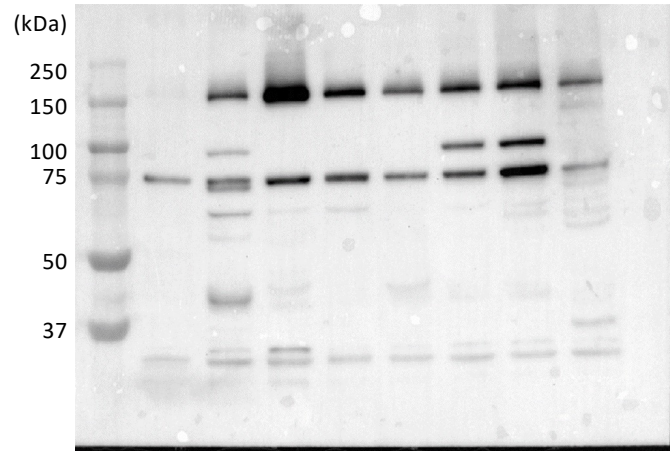

$\beta$ -actin
